# Supplementary material
Source: PubMed Central journal article supplement (PMC5844802)

## Supplementary Figure Legends

**Figure 1.** WNT5A is up-regulated by FOXC1 in **TNBC** cells. **A**, western blotting analysis of FOXC1 and WNT5A proteins in FOXC1-overexpressing or FOXC1-knockout **TNBC** cells. ACTIN was used as an internal control. The expression levels of WNT5A protein were quantified. The bar graph indicates mean  $\pm$  SD, n = 3. ns, not significant, \*\*, p < 0.01, \*\*\*, p < 0.001. **B** and **C**, real-time PCR analysis of WNT5A mRNA in FOXC1-overexpressing (**B**) and FOXC1-knockout (**C**) **TNBC** cells. Primers used were: WNT5A-forward: 5'-CCCTCGCCATGAAGAA GTCCA-3', WNT5A-reverse: 5'-CATACCTAGCGACC ACCAAGA-3'. The bar graph indicates mean  $\pm$  SD, n = 3. ns, not significant, \*\*, p < 0.01, \*\*\*, p < 0.001. **D**, western blotting analysis of WNT5A protein in different groups of MDA-MB-231 cells. ACTIN was used as an internal control. **E**, real-time PCR analysis of MMP7 mRNA expression in HCC1806 cells treated with different concentrations of WNT5A. The bar graph indicates mean  $\pm$  SD, n = 3. \*\*, p < 0.01, \*\*\*, p < 0.001.

**Figure 2.** WNT5A promoter is activated by a FOXC1 transactivator complex. **A**, Biotinylated oligonucleotide precipitation assays for the interaction of KHSRP and HNRNPH1 with the biotin-labeled WNT5A promoter oligo containing putative FOXC1-binding sites. Briefly, the 5'-biotinylated oligonucleotides were synthesized and annealed. Two micrograms of biotinylated double-stranded oligonucleotides were incubated with 20 $\mu$ g nuclear proteins at 4°C for 16h. DNA-bound proteins were precipitated using Streptavidin Agarose Beads (ThermoFisher) at 4°C for 2h, washed and detected by western blotting analysis using specific antibodies. The biotinylated oligonucleotide sequences of WNT5A promoter were: #1: Biotin-5'-forward: TTCGAAGACTGT AAAATGCCACAG, Biotin-5'-reverse: CTGTGGGCATTTT ACAGTCTTCGAA. #2: Biotin-

5'-forward: GACTCAGGAGGT AAAGGGGAGATGT, Biotin-5'-reverse: ACATCTCCCCTTT  
ACCTCCTGAGTC.

**Figure 3.** WNT5A activates NF- $\kappa$ B signaling in **TNBC** cells. **A**, western blotting analysis of WNT5A protein in different groups of MDA-MB-436 cells. ACTIN was used as an internal control. **B**, real-time PCR analysis of MMP7 mRNA in the cells treated with the SRC inhibitor Dasatinib (Selleckchem) at different concentrations. The bar graph indicates mean  $\pm$  SD, n = 3. \*\*\*, p < 0.001. **C**, western blotting analysis of p-SRC in different groups of MDA-MB-231 cells. Cells were treated with Dasatinib at different concentrations. ACTIN was used as an internal control. **D**, luciferase assay of HCC1806 cells transfected with NF- $\kappa$ B-responsive luciferase reporter construct and treated with recombinant WNT5A protein at different concentrations. The bar graph indicates mean  $\pm$  SD, n = 3. \*, p < 0.05, \*\*\*, p < 0.001. **E**, real-time PCR analysis of MMP7 mRNA in cells treated with the NF- $\kappa$ B inhibitor Bay 11-7082 at different concentrations. The bar graph indicates mean  $\pm$  SD, n = 3. \*\*, p < 0.01, \*\*\*, p < 0.001. **F**, real-time PCR analysis of KHSRP mRNA in cells treated with the NF- $\kappa$ B inhibitor Bay 11-7082 at different concentrations. The bar graph indicates mean  $\pm$  SD, n = 3. **G**, western blotting analysis result of p65 protein in different groups of cells. ACTIN was used as an internal control. The p65 antibody was from Santa Cruz (1:500, sc-8008). pCMV empty vector and pCMV-p65 were gifts from Xin Lin (MD Anderson Cancer Center).

**Figure 4.** WNT5A mediates FOXC1-induced invasiveness of **TNBC** cells. **A**, proliferation assays in different groups of MDA-MB-231 cells. Cells were seeded into opaque 96-well plates at 2000 cells per well. The cell proliferation rate was assessed using the CellTiter-Glo Luminescent Cell Viability Assay Kit (Promega) according to the manufacturer's instructions. **B** and **C**, migration (**B**) and invasion (**C**) assays in HCC1806 cells treated with different concentrations of recombinant

WNT5A protein. The bar graph indicates mean  $\pm$  SD, n = 3. \*\*, p < 0.01, \*\*\*, p < 0.001. **D** and **E**, real-time PCR analysis of MMP7 mRNA in MDA-MB-231 (**D**) and HCC1806 (**E**) cells. Cells were transfected with control or MMP7 siRNA. The bar graph indicates mean  $\pm$  SD, n = 3. \*\*\*, p < 0.001. **F** and **G**, migration assay (**F**) and invasion (**G**) assays in MMP7-knockdown HCC1806 cells treated with different concentrations of recombinant WNT5A protein. The bar graph indicates mean  $\pm$  SD, n = 3. \*\*\*, p < 0.001. **H** and **I**, western blotting analysis of MMP7 protein in different groups of MDA-MB-231 cells. pCMV-MMP7 (**H**) or pEGFP-C3-MMP7 (**I**) was transfected into FOXC1-WNT5A-KO MDA-MB-231 cells. ACTIN was used as an internal control.

Figure S1

A

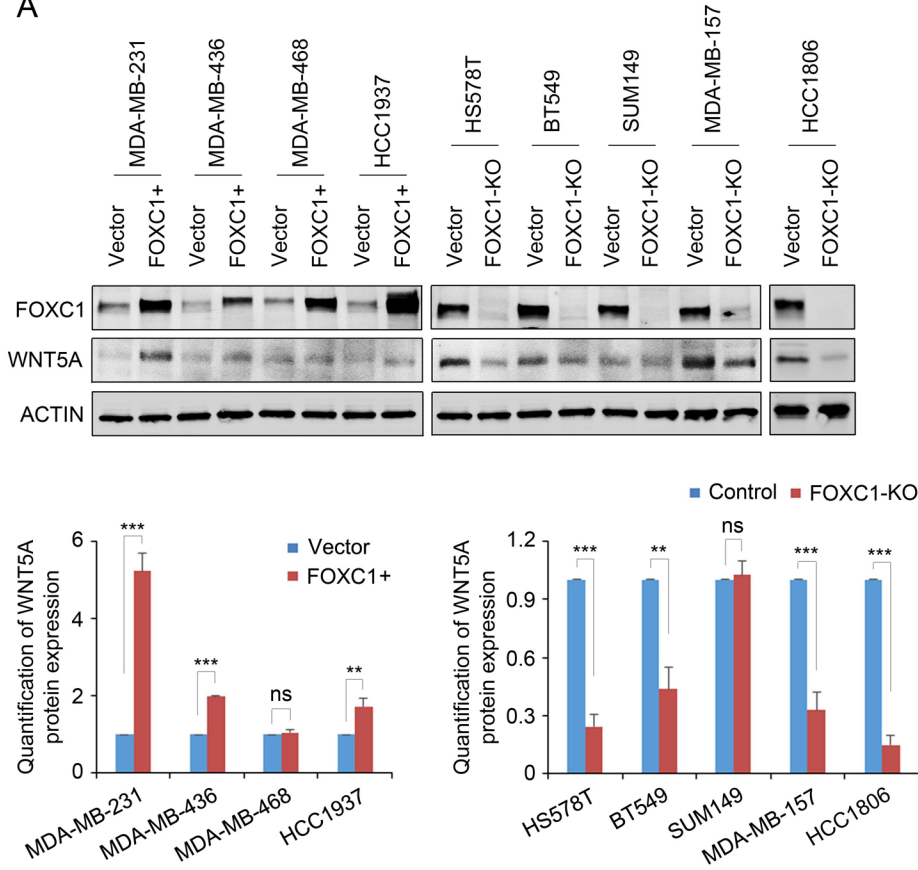

B

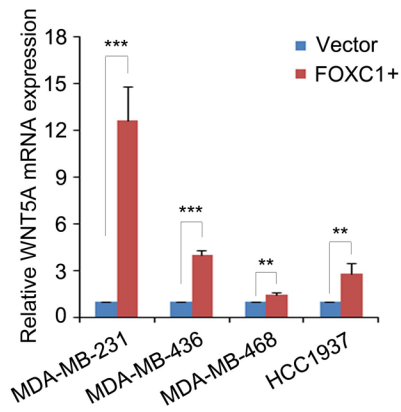

C

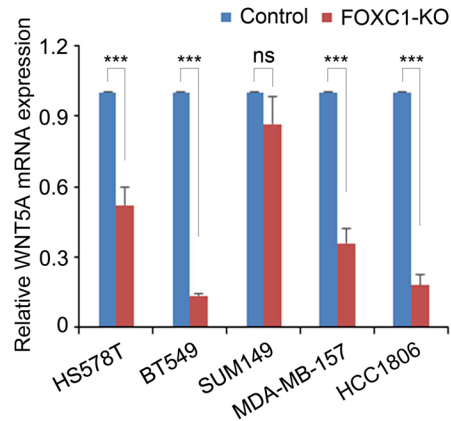

D

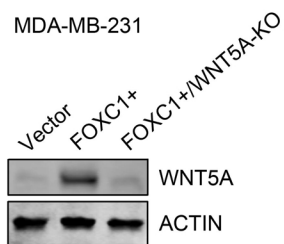

E

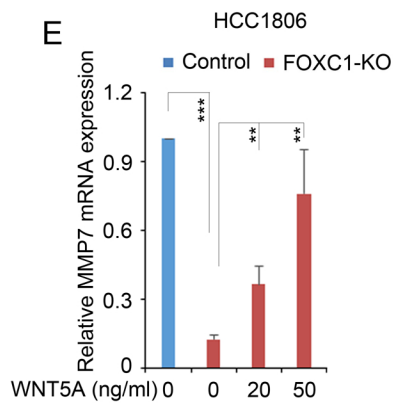



Figure S2

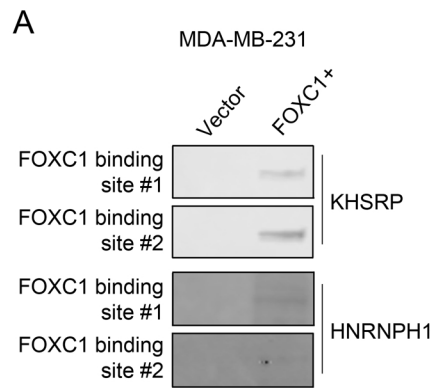

Figure S3

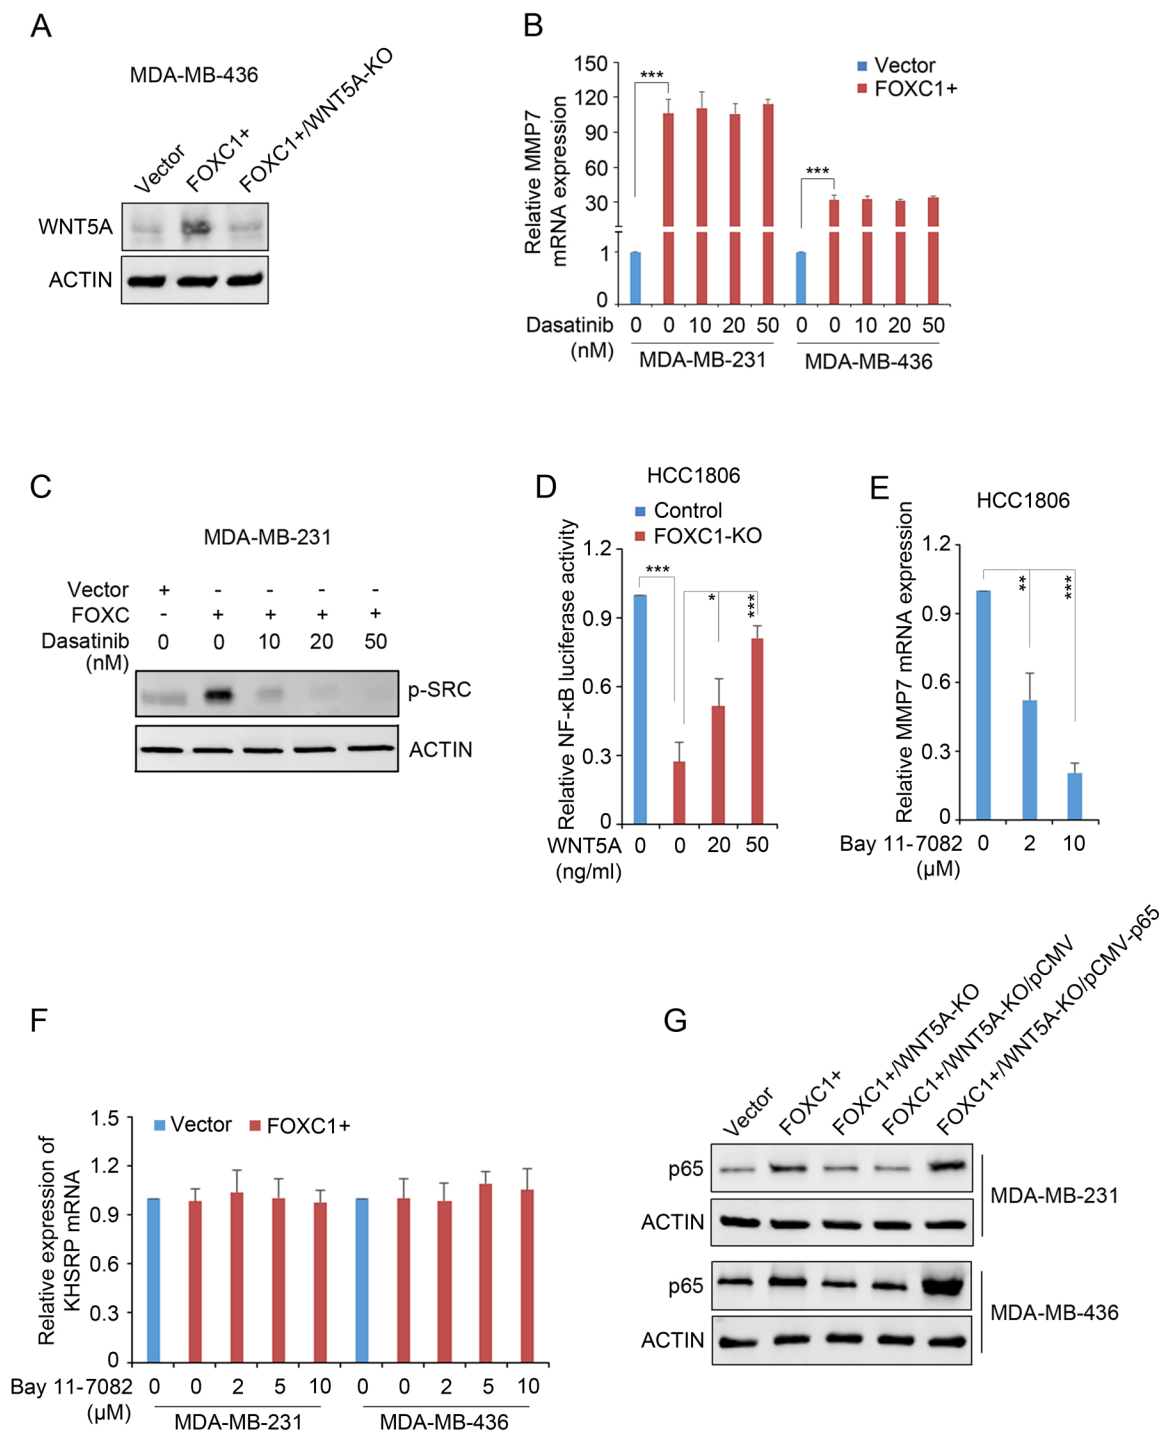

Figure S4

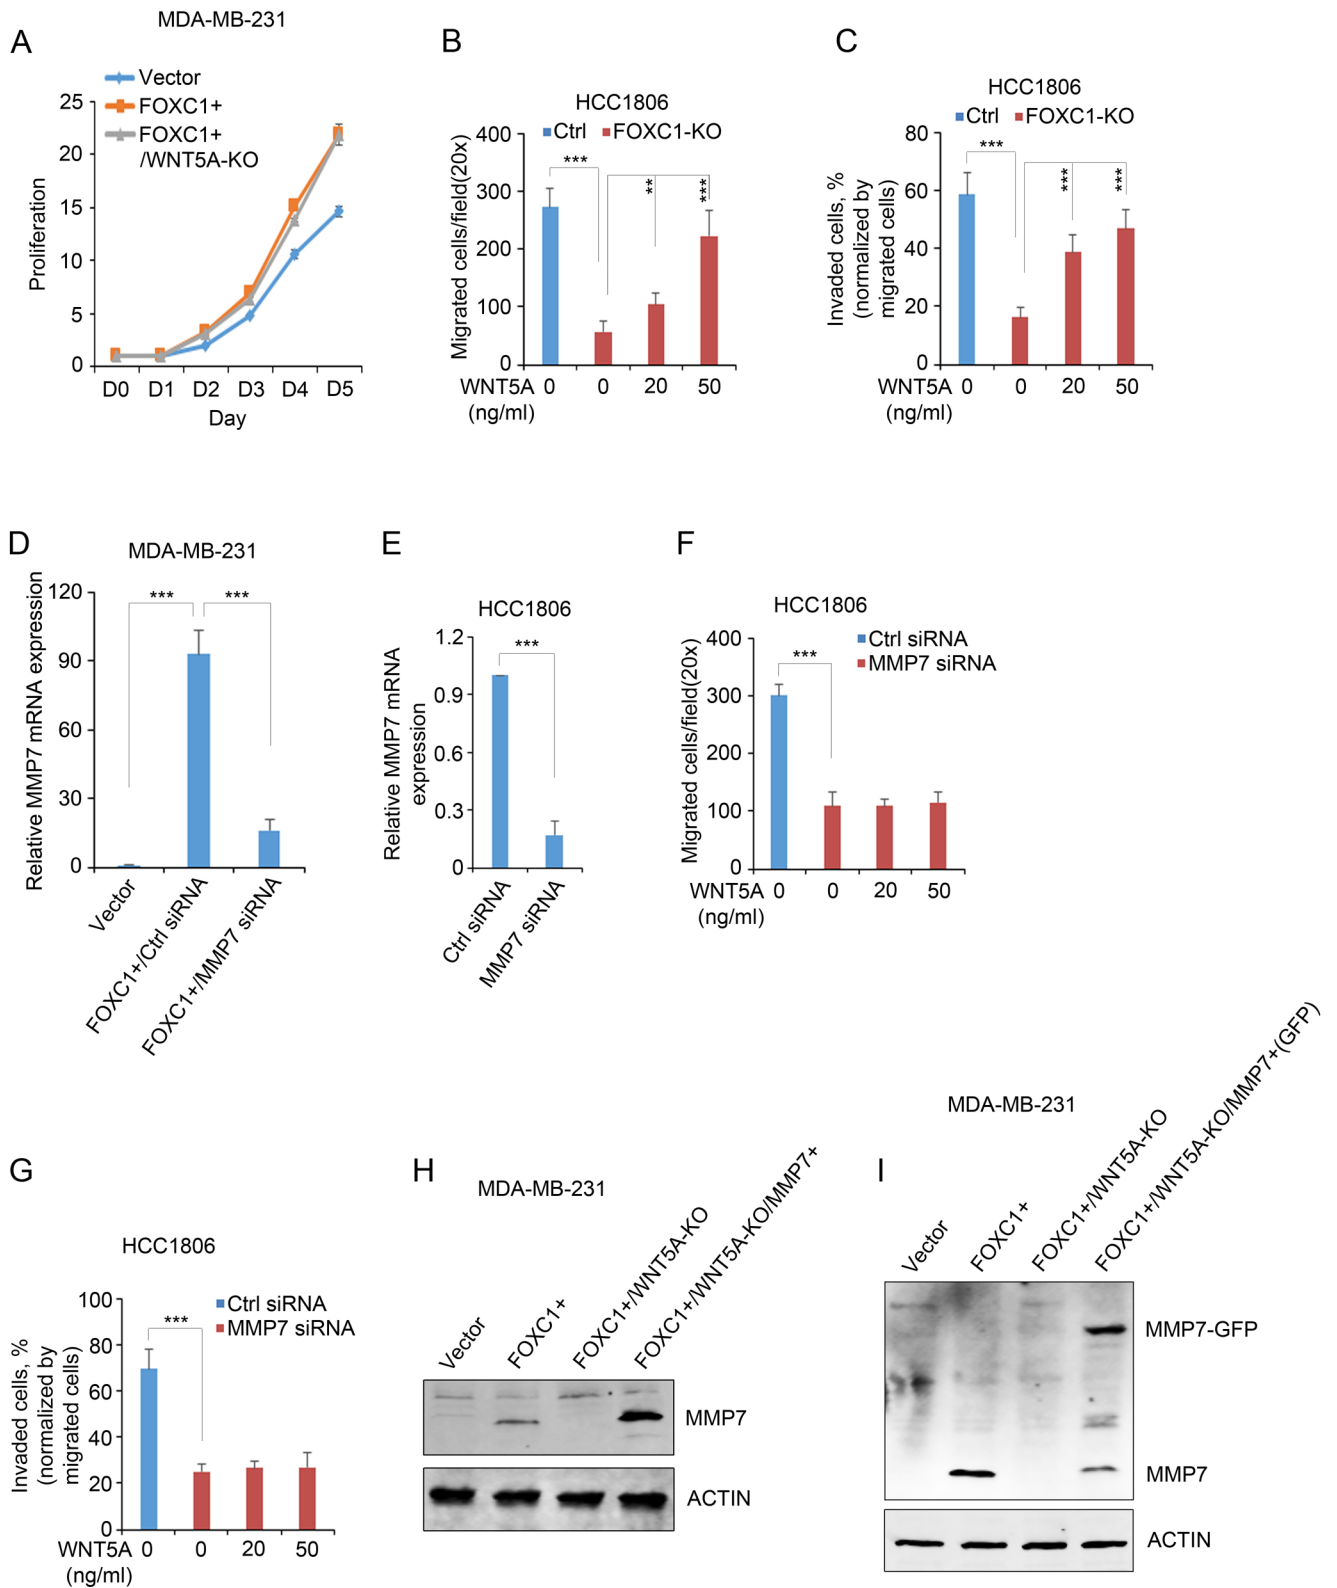

Supplement: NIHMS914538-supplement-1.pdf [file NIHMS914538-supplement-1.pdf]
